# Supplementary material for: Membrane curvature sensing and symmetry breaking of the M2 proton channel from Influenza A
Source: eLife. 2024 Aug 16;13:e81571. doi: 10.7554/eLife.81571 (PMC11383528; doi:10.7554/eLife.81571)
Supplement: Figure 2—source data 1. [file elife-81571-fig2-data1.xlsx]

## Sheet: Sheet1
Data extracted from Figure 7 of Kim, S. S., Upshur, M. A., Saotome, K., Sahu, I. D., McCarrick, R. M., Feix, J. B., Lorigan, G. A., & Howard, K. P. (2015). Cholesterol-Dependent Conformational Exchange of the C-Terminal Domain of the Influenza A M2 Protein. Biochemistry, 54(49), 7157-7167.
I51 Data		F55 Data
Distance [Å]	Distribution Value	Distance [Å]	Distribution Value
15.3231	0.0217391	15.3846	0.0247934
17.1692	0.0628019	16.6434	0.0881543
18.6462	0.111111	18.3217	0.184573
19.5077	0.157005	19.3007	0.236915
20.1231	0.200483	20.2797	0.261708
20.1231	0.202899	20.979	0.258953
21.2308	0.292271	21.6783	0.242424
21.9692	0.386473	22.9371	0.22314
22.5846	0.478261	23.6364	0.231405
23.3231	0.572464	24.4755	0.267218
23.8154	0.623188	25.8741	0.338843
24.5538	0.688406	27.2727	0.435262
25.4154	0.698068	28.6713	0.586777
25.9077	0.671498	29.7902	0.754821
26.6462	0.623188	30.6294	0.889807
27.0154	0.594203	31.3287	0.964187
27.7538	0.560386	32.5874	0.99449
28.4923	0.555556	33.5664	0.977961
29.1077	0.611111	34.5455	0.939394
29.7231	0.681159	35.1049	0.906336
30.3385	0.785024	35.9441	0.898072
31.2	0.89372	36.7832	0.928375
31.6923	0.975845	38.042	0.961433
32.4308	1	39.021	0.939394
33.2923	0.968599	39.7203	0.867769
34.2769	0.833333	40.4196	0.757576
34.8923	0.743961	41.2587	0.641873
35.1385	0.702899	41.6783	0.578512
35.5077	0.676329	42.0979	0.509642
36.4923	0.647343	42.5175	0.482094
37.3538	0.683575	43.3566	0.454545
38.2154	0.736715	44.1958	0.479339
39.2	0.801932	44.6154	0.515152
40.0615	0.823671	44.8951	0.553719
40.9231	0.804348	45.4545	0.683196
41.2923	0.768116	46.5734	0.848485
41.9077	0.707729	47.1329	0.928375
42.8923	0.599034	47.8322	0.988981
43.8769	0.44686	48.3916	1
45.1077	0.294686	48.8112	0.99449
46.3385	0.171498	49.5105	0.933884
47.6923	0.0772947	50.9091	0.735537
49.1692	0.031401	51.8881	0.504132
		52.4476	0.366391
		53.1469	0.22865
		53.8462	0.132231
		54.4056	0.0661157
		55.3846	0.0275482
