# Supplementary material for: Membrane curvature sensing and symmetry breaking of the M2 proton channel from Influenza A
Source: eLife journal article supplement (doi:10.7554/elife.81571), 2024-08-16

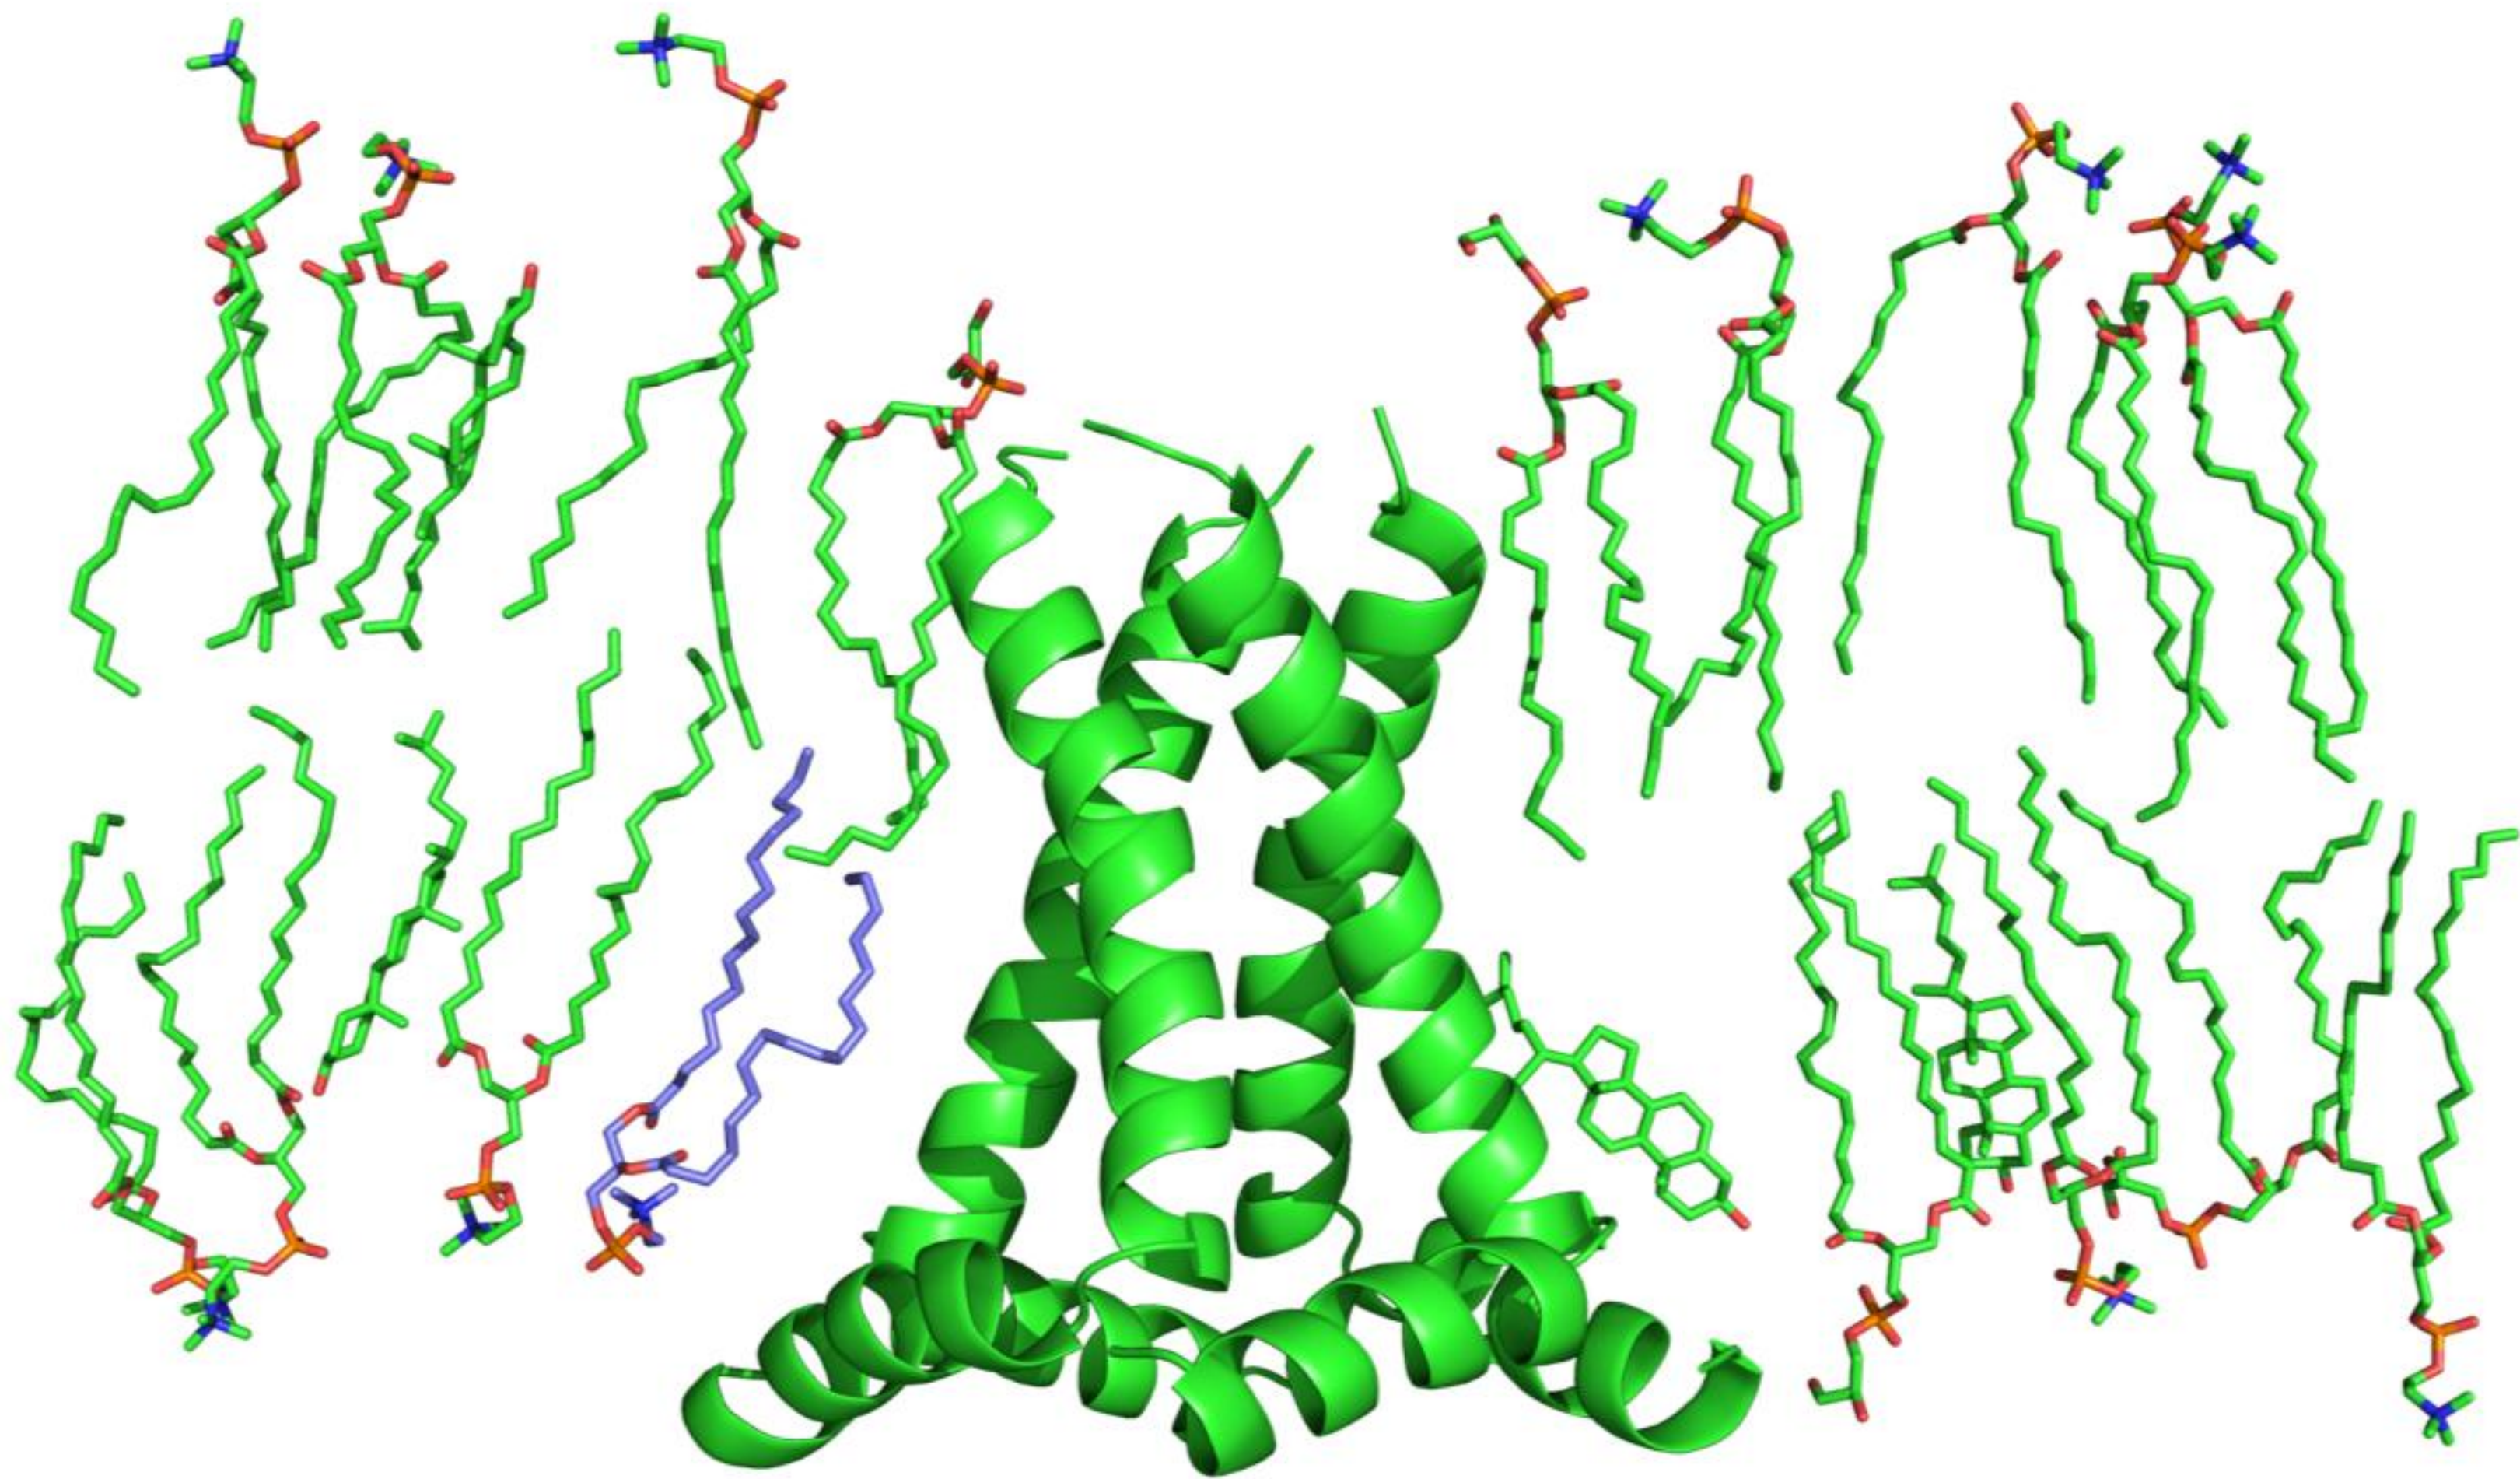

Supplement: supp [file elife_poa_e81571_Figure_7_source_data_1.pdf › elife_poa_e81571_Figure_7_source_data_1.pdf]
